# Supplementary material
Source: PubMed Central journal article supplement (PMC406522)
Supplement: jcinvest_113_10_1398__1.pdf [file jcinvest_113_10_1398__1.pdf]

mRNAs that increase in the absence of E2F1 and E2F2

| Accession no. | Gene description                                                 | Fold change | Gene    | Functional category |
|---------------|------------------------------------------------------------------|-------------|---------|---------------------|
| M83749        | Cyclin D2                                                        | 14,9        | Ccnd2   | Cell cycle          |
| L49507        | Cyclin G1                                                        | 4,0         | Ccng1   | Cell cycle          |
| AJ223087      | Cell division cycle 6 homolog ( <i>S. cerevisiae</i> )           | 3,5         | Cdc6    | Cell cycle          |
| U22399        | Cyclin-dependent kinase inhibitor 1C (P57)                       | 3,5         | Cdkn1c  | Cell cycle          |
| AB025409      | CDC28 protein kinase 1                                           | 2,0         | Cks1    | Cell cycle          |
| M38381        | CDC-like kinase                                                  | 2,1         | Clk     | Cell cycle          |
| U58992        | MAD homolog 1 ( <i>Drosophila</i> )                              | 2,0         | Madh1   | Cell cycle          |
| X62154        | Mini chromosome maintenance deficient ( <i>S. cerevisiae</i> )   | 2,8         | Mcmd    | Cell cycle          |
| D26090        | Mini chromosome maintenance deficient 5 ( <i>S. cerevisiae</i> ) | 2,5         | Mcmd5   | Cell cycle          |
| D26091        | Mini chromosome maintenance deficient 7 ( <i>S. cerevisiae</i> ) | 2,6         | Mcmd7   | Cell cycle          |
| Y07686        | Nuclear factor I/B                                               | 2,5         | Nfib    | Cell cycle          |
| AW124052      | Origin recognition complex, subunit 3-like                       | 2,1         | Orc3l   | Cell cycle          |
| X57800        | Proliferating cell nuclear antigen                               | 2,8         | Pcna    | Cell cycle          |
| U35142        | Retinoblastoma binding protein 7                                 | 3,5         | Rbbp7   | Cell cycle          |
| D49382        | Septin 2                                                         | 3,5         | sept2   | Cell cycle          |
| AJ223782      | Septin 7                                                         | 2,6         | sept7   | Cell cycle          |
| L22472        | Bcl2-associated X protein                                        | 2,8         | Bax     | Apoptosis           |
| L38971        | Integral membrane protein 2A                                     | 5,3         | Itm2a   | Apoptosis           |
| U76253        | Integral membrane protein 2B                                     | 3,5         | Itm2b   | Apoptosis           |
| X57687        | Lymphoblastic leukemia                                           | 16,0        | Lyl1    | Apoptosis           |
| X58861        | Complement component 1, q subcomponent, alpha polypeptide        | 2,8         | C1qa    | Stress              |
| M22531        | Complement component 1, q subcomponent, beta polypeptide         | 5,7         | C1qb    | Stress              |
| X66295        | Complement component 1, q subcomponent, gamma polypeptide        | 2,6         | C1qg    | Stress              |
| K02782        | Complement component 3                                           | 5,7         | C3      | Stress              |
| AF055664      | DnaJ (Hsp40) homolog, subfamily A, member 1                      | 2,8         | Dnaja1  | Stress              |
| J04633        | heat shock protein, 1                                            | 2,1         | Hsp86-1 | Stress              |
| X13297        | Actin, alpha 2, smooth muscle, aorta                             | 24,3        | Acta2   | Cytoskeleton        |
| M21495        | Actin, gamma, cytoplasmic                                        | 2,6         | Actg    | Cytoskeleton        |
| U16741        | Capping protein (actin filament) muscle Z-line, alpha 2          | 3,2         | Capza2  | Cytoskeleton        |
| AI853217      | Cadherin 5                                                       | 3,2         | Cdh5    | Cytoskeleton        |
| M13018        | Cysteine rich intestinal protein                                 | 7,0         | Crip    | Cytoskeleton        |
| D88793        | Cysteine rich protein 1                                          | 2,5         | Csrp1   | Cytoskeleton        |

|          |                                                                          |      |         |                   |
|----------|--------------------------------------------------------------------------|------|---------|-------------------|
| J04953   | Gelsolin                                                                 | 4,3  | Gsn     | Cytoskeleton      |
| M36120   | Keratin complex 1, acidic, gene 19                                       | 3,2  | Krt1-19 | Cytoskeleton      |
| D49733   | Lamin A                                                                  | 2,1  | Lmna    | Cytoskeleton      |
| L23769   | Microfibrillar-associated protein 2                                      | 2,5  | Mfap2   | Cytoskeleton      |
| U38967   | Thymosin, beta 4, X chromosome                                           | 5,3  | Tmsb4x  | Cytoskeleton      |
| M28729   | Tubulin, alpha 1                                                         | 2,8  | Tuba7   | Cytoskeleton      |
| M28727   | Tubulin, alpha 2                                                         | 2,5  | Tuba2   | Cytoskeleton      |
| M28739   | Tubulin, beta 2                                                          | 6,1  | Tubb2   | Cytoskeleton      |
| X04663   | Tubulin, beta 5                                                          | 3,0  | Tubb5   | Cytoskeleton      |
| X01838   | Beta-2 microglobulin                                                     | 4,9  | B2m     | Inflammatory      |
| U49513   | Chemokine (C-C motif) ligand 9                                           | 2,0  | Ccl9    | Inflammatory      |
| AI847784 | CD34 antigen                                                             | 2,3  | Cd34    | Inflammatory      |
| AB012693 | CD47 antigen (Rh-related antigen, integrin-associated signal transducer) | 2,3  | Cd47    | Inflammatory      |
| L08115   | CD9 antigen                                                              | 2,3  | Cd9     | Inflammatory      |
| AF030636 | Chemokine (C-X-C motif) ligand 13                                        | 3,5  | Cxcl13  | Inflammatory      |
| AF061260 | Immunoglobulin superfamily, member 4                                     | 4,0  | Igsf4   | Inflammatory      |
| X00496   | Ia-associated invariant chain                                            | 10,6 | Ii      | Inflammatory      |
| D37837   | Lymphocyte cytosolic protein 1                                           | 3,7  | Lcp1    | Inflammatory      |
| D50463   | Stromal cell derived factor receptor 1                                   | 2,3  | Sdfr1   | Inflammatory      |
| X97227   | CD53 antigen                                                             | 10,6 | Cd53    | Fibrotic response |
| AF011450 | Procollagen, type XV                                                     | 4,0  | Col15a1 | Fibrotic response |
| L22545   | Procollagen, type XVIII, alpha 1                                         | 2,8  | Col18a1 | Fibrotic response |
| U03419   | Procollagen, type I, alpha 1                                             | 5,7  | Col1a1  | Fibrotic response |
| X58251   | Procollagen, type I, alpha 2                                             | 4,6  | Col1a2  | Fibrotic response |
| AA655199 | Procollagen, type III, alpha 1                                           | 6,5  | Col3a1  | Fibrotic response |
| M15832   | Procollagen, type IV, alpha 1                                            | 4,0  | Col4a1  | Fibrotic response |
| L02918   | Procollagen, type V, alpha 2                                             | 2,5  | Col5a2  | Fibrotic response |
| Z18272   | Procollagen, type VI, alpha 2                                            | 2,6  | Col6a2  | Fibrotic response |
| AF064749 | Procollagen, type VI, alpha 3                                            | 4,9  | Col6a3  | Fibrotic response |
| AJ006469 | Cartilage associated protein                                             | 2,0  | Crtap   | Fibrotic response |
| X53929   | Decorin                                                                  | 6,1  | Dcn     | Fibrotic response |
| AA919594 | Elastin                                                                  | 4,3  | Eln     | Fibrotic response |
| X98471   | Epithelial membrane protein 1                                            | 2,6  | Emp1    | Fibrotic response |
| X75285   | Fibulin 2                                                                | 2,6  | Fbln2   | Fibrotic response |
| M63801   | Gap junction membrane channel protein alpha 1                            | 4,9  | Gja1    | Fibrotic response |

|          |                                                                                             |       |              |                      |
|----------|---------------------------------------------------------------------------------------------|-------|--------------|----------------------|
| X15202   | Integrin beta 1 (fibronectin receptor beta)                                                 | 3,0   | Itgb1        | Fibrotic response    |
| U69176   | Laminin, alpha 4                                                                            | 3,7   | Lama4        | Fibrotic response    |
| AA874589 | LIM and senescent cell antigen-like domains 1                                               | 2,8   | Lims1        | Fibrotic response    |
| AF013262 | Lumican                                                                                     | 5,3   | Lum          | Fibrotic response    |
| M32486   | Mouse 19.5 mRNA                                                                             | 8,6   | M32486       | Fibrotic response    |
| L17324   | Nidogen 1                                                                                   | 4,0   | Nid1         | Fibrotic response    |
| AB017202 | Nidogen 2                                                                                   | 2,6   | Nid2         | Fibrotic response    |
| D31951   | Osteoglycin                                                                                 | 6,1   | Ogn          | Fibrotic response    |
| D13664   | Osteoblast specific factor 2 (fasciclin I-like)                                             | 21,1  | Osf2-pending | Fibrotic response    |
| X04017   | Secreted acidic cysteine rich glycoprotein                                                  | 6,5   | Sparc        | Fibrotic response    |
| AF061017 | UDP-glucose dehydrogenase                                                                   | 3,0   | Ugdh         | Fibrotic response    |
| U21489   | Acetyl-Coenzyme A dehydrogenase, long-chain                                                 | 8,6   | Acadl        | Metabolism           |
| U07159   | Acetyl-Coenzyme A dehydrogenase, medium chain                                               | 2,1   | Acadm        | Metabolism           |
| U49915   | Adipocyte complement related protein                                                        | 59,7  | Acrp30       | Metabolism           |
| M84147   | Alcohol dehydrogenase 5 (class III), chi polypeptide                                        | 2,3   | Adh5         | Metabolism           |
| X04673   | Adipsin                                                                                     | 97,0  | Adn          | Metabolism           |
| M15268   | Aminolevulinic acid synthase 2, erythroid                                                   | 4,0   | Alas2        | Metabolism           |
| D00466   | Apolipoprotein E                                                                            | 8,6   | Apoe         | Metabolism           |
| X73230   | Arylsulfatase A                                                                             | 7,5   | Arsa         | Metabolism           |
| AJ006474 | Carbonic anhydrase 3                                                                        | 104,0 | Car3         | Metabolism           |
| AI854020 | Cysteine dioxygenase 1, cytosolic                                                           | 3,5   | Cdo1         | Metabolism           |
| AW226939 | Carboxylesterase 3                                                                          | 4,6   | Ces3         | Metabolism           |
| D16215   | Flavin containing monooxygenase 1                                                           | 2,5   | Fmo1         | Metabolism           |
| V00714   | Hemoglobin alpha, adult chain 1                                                             | 2,6   | Hba-a1       | Metabolism           |
| AF073993 | Heterogeneous nuclear ribonucleoprotein A2/B1                                               | 2,5   | Hnrpa2b1     | Metabolism           |
| U34259   | Lysosomal-associated protein transmembrane 4A                                               | 2,0   | Laptm4a      | Metabolism           |
| U29539   | Lysosomal-associated protein transmembrane 5                                                | 12,1  | Laptm5       | Metabolism           |
| X15986   | Lectin, galactose binding, soluble 1                                                        | 2,6   | Lgals1       | Metabolism           |
| M63335   | Lipoprotein lipase                                                                          | 5,3   | Lpl          | Metabolism           |
| M21050   | Lysozyme                                                                                    | 6,1   | Lyzs         | Metabolism           |
| X51547   | P lysozyme structural                                                                       | 16,0  | Lzp-s        | Metabolism           |
| L10244   | Spermidine/spermine N1-acetyl transferase                                                   | 2,3   | Sat          | Metabolism           |
| M21285   | Stearoyl-Coenzyme A desaturase 1                                                            | 55,7  | Scd1         | Metabolism           |
| U27315   | Solute carrier family 25 (mitochondrial carrier; adenine nucleotide translocator), member 4 | 3,7   | Slc25a4      | Metabolism           |
| M69260   | Annexin A1                                                                                  | 8,0   | Anxa1        | Signaling and growth |

|          |                                                                               |      |         |                      |
|----------|-------------------------------------------------------------------------------|------|---------|----------------------|
| M14044   | Annexin A2                                                                    | 4,6  | Anxa2   | Signaling and growth |
| AJ001633 | Annexin A3                                                                    | 2,6  | Anxa3   | Signaling and growth |
| X99963   | Ras homolog gene family, member AB                                            | 3,2  | Arhb    | Signaling and growth |
| U97327   | Calcyclin binding protein                                                     | 2,8  | Cacybp  | Signaling and growth |
| M27844   | Calmodulin 2                                                                  | 3,5  | Calm2   | Signaling and growth |
| L78075   | Cell division cycle 42 homolog (S. cerevisiae)                                | 2,6  | Cdc42   | Signaling and growth |
| AF109905 | Chloride intracellular channel 1                                              | 4,3  | Clic1   | Signaling and growth |
| U18869   | Disabled homolog 2 (Drosophila)                                               | 6,5  | Dab2    | Signaling and growth |
| U42385   | Fibroblast growth factor inducible 16                                         | 3,7  | Fin16   | Signaling and growth |
| AV138783 | Growth arrest and DNA-damage-inducible 45 beta                                | 13,0 | Gadd45b | Signaling and growth |
| X59846   | Growth arrest specific 6                                                      | 2,3  | Gas6    | Signaling and growth |
| AW047476 | guanylate nucleotide binding protein 3                                        | 10,6 | Gbp3    | Signaling and growth |
| M13963   | Guanine nucleotide binding protein, alpha inhibiting 2                        | 3,0  | Gnai2   | Signaling and growth |
| U29055   | Guanine nucleotide binding protein, beta 1                                    | 3,5  | Gnb1    | Signaling and growth |
| AF077861 | Inhibitor of DNA binding 2                                                    | 5,7  | Idb2    | Signaling and growth |
| X76066   | Insulin-like growth factor binding protein 4                                  | 18,4 | Igfbp4  | Signaling and growth |
| L12447   | Insulin-like growth factor binding protein 5                                  | 8,0  | Igfbp5  | Signaling and growth |
| M57647   | Kit ligand                                                                    | 2,3  | Kitl    | Signaling and growth |
| Z11974   | Mannose receptor, C type 1                                                    | 8,0  | Mrc1    | Signaling and growth |
| AI642048 | Nuclear factor of kappa light chain gene enhancer in B-cells inhibitor, alpha | 3,2  | Nfkbia  | Signaling and growth |
| AF014010 | Polycystic kidney disease 2                                                   | 7,0  | Pkd2    | Signaling and growth |
| X60367   | Retinol binding protein 1, cellular                                           | 4,0  | Rbp1    | Signaling and growth |
| M16465   | S100 calcium binding protein A10 (calpactin)                                  | 3,5  | S100a10 | Signaling and growth |
| U41341   | S100 calcium binding protein A11 (calizzarin)                                 | 4,6  | S100a11 | Signaling and growth |
| X99921   | S100 calcium binding protein A13                                              | 3,7  | S100a13 | Signaling and growth |
| X66449   | S100 calcium binding protein A6 (calcyclin)                                   | 5,3  | S100a6  | Signaling and growth |
| X68837   | Secretogranin II                                                              | 3,7  | Scg2    | Signaling and growth |
| U59864   | TRAF family member-associated Nf-kappa B activator                            | 2,6  | Tank    | Signaling and growth |
| AF024637 | TYRO protein tyrosine kinase binding protein                                  | 3,7  | Tyrobp  | Signaling and growth |
| M62470   | Thrombospondin 1                                                              | 4,0  | Thbs1   | Signaling and growth |
| AB016592 | Anterior gradient 2 (Xenopus laevis)                                          | 9,2  | Agr2    | Miscellaneous        |
| AI840158 | Angiopoietin-like 2                                                           | 2,5  | Angptl2 | Miscellaneous        |
| AI847561 | Adaptor-related protein complex AP-4, sigma 1                                 | 2,1  | Ap4s1   | Miscellaneous        |
| M97216   | Amyloid beta (A4) precursor-like protein 2                                    | 2,1  | Aplp2   | Miscellaneous        |
| AI852534 | Basic leucine zipper and W2 domains 1                                         | 2,3  | Bzw1    | Miscellaneous        |

|          |                                                                        |      |          |               |
|----------|------------------------------------------------------------------------|------|----------|---------------|
| AW125626 | Calponin 3, acidic                                                     | 2,3  | Cnn3     | Miscellaneous |
| AJ009840 | Cathepsin E                                                            | 2,6  | Ctse     | Miscellaneous |
| AJ223208 | Cathepsin S                                                            | 9,8  | Ctss     | Miscellaneous |
| AJ242663 | Cathepsin Z                                                            | 2,5  | Ctsz     | Miscellaneous |
| AB025406 | Dextrin                                                                | 2,1  | Dstn     | Miscellaneous |
| U78103   | Embryonic ectoderm development                                         | 2,3  | Eed      | Miscellaneous |
| AW122933 | Ectonucleotide pyrophosphatase/phosphodiesterase 2                     | 27,9 | Enpp2    | Miscellaneous |
| U72519   | Ena-vasodilator stimulated phosphoprotein                              | 13,9 | Evl      | Miscellaneous |
| Z38110   | Peripheral myelin protein, 22 kDa                                      | 3,0  | Pmp22    | Miscellaneous |
| U25844   | Serine (or cysteine) proteinase inhibitor, clade B, member 6           | 2,3  | Serpinb6 | Miscellaneous |
| AF036164 | Serine (or cysteine) proteinase inhibitor, clade F, member 1           | 9,8  | Serpinf1 | Miscellaneous |
| X60676   | Serine (or cysteine) proteinase inhibitor, clade H, member 1           | 4,3  | Serpinh1 | Miscellaneous |
| AF072697 | Selective hybridizing clone                                            | 4,9  | Shyc     | Miscellaneous |
| X93357   | Synovial sarcoma translocation, Chromosome 18                          | 2,0  | Ss18     | Miscellaneous |
| Z47088   | Transcription elongation factor B (SIII), polypeptide 1 (15 kDa),-like | 2,0  | Tceb11   | Miscellaneous |
| AW122469 | Testis expressed gene 189                                              | 2,1  | Tex189   | Miscellaneous |
| AA760359 | Translocase of inner mitochondrial membrane 22 homolog                 | 5,3  | Timm22   | Miscellaneous |
| AF062071 | Zinc finger protein 216                                                | 3,0  | Zfp216   | Miscellaneous |

---

mRNAs that decrease in the absence of E2F1 and E2F2

| Accesión no. | Gene description                             | Fold change | Gene     | Functional category  |
|--------------|----------------------------------------------|-------------|----------|----------------------|
| J03482       | Histone 1, H1c                               | 2,5         | Hist1h1c | Signaling and growth |
| V00835       | Metallothionein 1                            | 3,5         | Mt1      | Stress               |
| K02236       | Metallothionein 2                            | 2,5         | Mt2      | Stress               |
| AB019600     | Caspase 9                                    | 3,0         | Casp9    | Apoptosis            |
| Z49204       | Nicotinamide nucleotide transhydrogenase     | 2,3         | Nnt      | Metabolism           |
| U09189       | Loricrin                                     | 2,3         | Lor      | Cytoskeleton         |
| U37386       | Carboxyl ester lipase                        | 2,6         | Cel      | Pancreatic function  |
| X02578       | Amylase                                      | 2,5         | Amy      | Pancreatic function  |
| D89664       | Glycine N-methyltransferase                  | 3,2         | Gnmt     | Pancreatic function  |
| X04480       | Insulin-like growth factor 1                 | 2,8         | Igf1     | Pancreatic function  |
| D63359       | Pancreatitis-associated protein              | 73,5        | Pap      | Pancreatic function  |
| D14011       | Regenerating islet-derived 2                 | 4,6         | Reg2     | Pancreatic function  |
| D63357       | Regenerating islet-derived 3 alpha           | 64,0        | Reg3a    | Pancreatic function  |
| D45858       | Synaptotagmin 3                              | 3,7         | Syt3     | Pancreatic function  |
| X04574       | Trypsin 2                                    | 2,5         | Try2     | Pancreatic function  |
| U37438       | Deleted in malignant brain tumors 1          | 5,3         | Dmbt1    | Miscellaneous        |
| AF023919     | Inter alpha-trypsin inhibitor, heavy chain 4 | 5,7         | Itih4    | Miscellaneous        |

Transcripts differentially regulated in pancreas by loss of E2F1 and E2F2. Listed are the genes that are increased or decreased an average of  $\geq 2$ -fold upon concomitant loss of E2F1 and E2F2. mRNAs that decrease are those which require E2F1 and/or E2F2 for high level expression; mRNAs that increase in the absence of E2F1 and E2F2 are those which are negatively regulated by E2F1 and/or E2F2.
